# Supplementary material for: Milk Consumption Decreases Risk for Breast Cancer in Korean Women under 50 Years of Age: Results from the Health Examinees Study
Source: MDPI journal article supplement (doi:10.3390/nu12010032), 2019-12-21
Supplement: s1 [file s1]

**Table S1.** Hazard ratios (HRs) and 95% confidence intervals (CIs) of breast cancer according to yogurt consumption.

|                          | Yogurt Consumption (Serving) |                   |                   |                   | <i>p</i> for Trend <sup>b</sup> |
|--------------------------|------------------------------|-------------------|-------------------|-------------------|---------------------------------|
|                          | <1/week                      | 1/week            | 2-6/week          | ≥1/day            |                                 |
| <b>Age &lt;50 years</b>  |                              |                   |                   |                   |                                 |
| Person-years             | 100,729                      | 39,212            | 29,867            | 23,229            |                                 |
| Number                   | 15,624                       | 6134              | 4500              | 3545              |                                 |
| Breast Cancer Cases      | 74                           | 28                | 29                | 19                |                                 |
| HR (95% CI) <sup>a</sup> | 1.00 (ref)                   | 0.94 (0.61, 1.46) | 1.27 (0.82, 1.97) | 1.03 (0.61, 1.74) | 0.6636                          |
| <b>Age ≥50 years</b>     |                              |                   |                   |                   |                                 |
| Person-years             | 161,894                      | 51,439            | 42,369            | 45,751            |                                 |
| Number                   | 26,042                       | 8419              | 6808              | 7248              |                                 |
| Breast Cancer Cases      | 112                          | 27                | 41                | 29                |                                 |
| HR (95% CI) <sup>a</sup> | 1.00 (ref)                   | 0.73 (0.48, 1.11) | 1.29 (0.90, 1.86) | 0.82 (0.54, 1.25) | 0.7101                          |

<sup>a</sup> HR (95% CI) : adjusted for BMI (kg/m<sup>2</sup>, continuous), total energy intake (kcal/day, continuous), educational level (middle school or less, high school or college, undergraduate or more), parity (nulliparous, 1, 2, ≥3), age at first birth (nulliparous, aged <25 years at first birth, aged ≥25 at first birth), age at menarche (<15, 15, ≥16 years), oral contraceptive use (never, ever), regular exercise (no, yes), alcohol consumption (never, ever), and the presence of a family history of breast cancer (no, yes); <sup>b</sup> P for trend was calculated using the median value of each category as a continuous variable.

**Table S2.** Hazard ratios (HRs) and 95% confidence intervals (CIs) of breast cancer according to cheese consumption.

|                          | Cheese Consumption (Serving) |                   |                   | <i>p</i> for Trend <sup>b</sup> |
|--------------------------|------------------------------|-------------------|-------------------|---------------------------------|
|                          | <1/week                      | 1/week            | ≥2/week           |                                 |
| <b>Age &lt;50 years</b>  |                              |                   |                   |                                 |
| Person-years             | 173,973                      | 11,894            | 7171              |                                 |
| Number                   | 26,666                       | 1974              | 1163              |                                 |
| Breast Cancer Cases      | 128                          | 14                | 8                 |                                 |
| HR (95% CI) <sup>a</sup> | 1.00 (ref)                   | 1.57 (0.89, 2.75) | 1.43 (0.69, 2.96) | 0.2461                          |
| <b>Age ≥50 years</b>     |                              |                   |                   |                                 |
| Person-years             | 274,297                      | 13,592            | 13,565            |                                 |
| Number                   | 43,913                       | 2308              | 2296              |                                 |
| Breast Cancer Cases      | 183                          | 9                 | 17                |                                 |
| HR (95% CI) <sup>a</sup> | 1.00 (ref)                   | 0.87 (0.44, 1.71) | 1.61 (0.97, 2.68) | 0.0757                          |

<sup>a</sup> HR (95% CI) : adjusted for BMI (kg/m<sup>2</sup>, continuous), total energy intake (kcal/day, continuous), educational level (middle school or less, high school or college, undergraduate or more), parity (nulliparous, 1, 2, ≥3), age at first birth (nulliparous, aged <25 years at first birth, aged ≥25 at first birth), age at menarche (<15, 15, ≥16 years), oral contraceptive use (never, ever), regular exercise (no, yes), alcohol consumption (never, ever), and the presence of a family history of breast cancer (no, yes); <sup>b</sup> P for trend was calculated using the median value of each category as a continuous variable.
